# Supplementary material for: A history of TOPMODEL
Source: Copernicus journal article supplement (doi:10.5194/hess-25-527-2021), 2021-02-02
Supplement: Supplementary file 1 [file hess-25-527-2021-supplement.pdf]

Supplement of Hydrol. Earth Syst. Sci., 25, 527–549, 2021  
<https://doi.org/10.5194/hess-25-527-2021-supplement>  
© Author(s) 2021. This work is distributed under  
the Creative Commons Attribution 4.0 License.

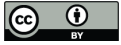

*Supplement of*

## **A history of TOPMODEL**

**Keith J. Beven et al.**

*Correspondence to:* Keith Beven ([k.beven@lancaster.ac.uk](mailto:k.beven@lancaster.ac.uk))

The copyright of individual parts of the supplement might differ from the CC BY 4.0 License.

**Beven et al. A History of Topmodel  
Electronic Supplement  
Time line of Topmodel and related developments**

| Year | Development                                                                                                | Topographic analysis                             | Hydrograph Prediction (with catchment) and Topmodel Software   | Flood Frequency Estimation by continuous simulation (with catchment) | Land Surface Parameterisations with explicit energy budget components | Water Quality Prediction (with catchment) | Parallel Developments |
|------|------------------------------------------------------------------------------------------------------------|--------------------------------------------------|----------------------------------------------------------------|----------------------------------------------------------------------|-----------------------------------------------------------------------|-------------------------------------------|-----------------------|
| 1975 | First publication of the Topographic index                                                                 | Kirkby 1975 (manual methods)                     | Kirkby, 1975 (East Twin)                                       |                                                                      |                                                                       |                                           |                       |
| 1977 | First conference publication of application of Topmodel                                                    | Beven and Kirkby, 1977 (manual methods)          | Beven and Kirkby, 1977 (Crimple Beck)                          |                                                                      |                                                                       |                                           |                       |
| 1979 | First journal publication of application of Topmodel to Crimple Beck data                                  |                                                  | Beven and Kirkby, 1979 (Crimple Beck)                          |                                                                      |                                                                       |                                           |                       |
| 1981 | First publication of O'Loughlin Wetness index                                                              |                                                  |                                                                |                                                                      |                                                                       |                                           | O'Loughlin, 1981      |
| 1982 | First formulation of soil-topographic index                                                                |                                                  | Beven (University of Virginia research report) (White Oak Run) |                                                                      |                                                                       |                                           |                       |
| 1983 | Derivation of topographic index for geometric hillslopes                                                   | Beven and Wood, 1983, (analytical relationships) |                                                                |                                                                      |                                                                       |                                           |                       |
| 1986 | First use of soil-topographic index in flood frequency estimation                                          |                                                  |                                                                | Beven, 1986a,b, 1987 (Plynlimon)                                     |                                                                       |                                           |                       |
| 1987 | First dimensionless form of Topmodel based on a gamma distribution representation of the topographic index | Sivapalan et al. (1987)                          | Sivapalan et al., (1987)                                       |                                                                      |                                                                       |                                           |                       |

|      |                                                                                       |                                                               |                                                                          |                                          |
|------|---------------------------------------------------------------------------------------|---------------------------------------------------------------|--------------------------------------------------------------------------|------------------------------------------|
| 1991 | First published derivation of topographic index from digital terrain analysis         | Quinn et al. 1991 (multiple downslope direction partitioning) |                                                                          |                                          |
| 1991 | First use of reference level concept                                                  |                                                               | Quinn et al., 1991 (Booro-Borotou)                                       |                                          |
| 1992 | First application of Topmodel to water quality prediction                             |                                                               |                                                                          | Robson et al., 1992 (Hafren, Plynlimon)) |
| 1993 | First use of Topmodel with GLUE uncertainty estimation                                |                                                               | Beven, 1993; Freer et al., 1996 (Maimai) Bruneau et al. (1993) (Naizin); |                                          |
| 1993 | Investigation of sensitivity to space and time resolution                             |                                                               | Zhang and Montgomery (1994); Wolock and Price (1994)                     |                                          |
| 1993 | Use of Topmodel concepts within the RHESSyS model                                     |                                                               |                                                                          | Band et al. (1993)                       |
| 1994 | Critique of steady state assumption in estimation of contributing areas               |                                                               |                                                                          | Barling et al., 1994                     |
| 1994 | Topmodel first used as basis of Land Surface Parameterisation                         |                                                               | Familglietti and Wood, 1994 (TOPLATS)                                    |                                          |
| 1995 | First publication of Topkapi concepts                                                 |                                                               |                                                                          | Todini, 1995                             |
| 1996 | Generalisation of transmissivity profiles to parabolic and linear functions and index |                                                               | Ambroise et al. 1996a (Ringelbach)                                       |                                          |

|      |                                                                                                                |                                                                   |                                             |
|------|----------------------------------------------------------------------------------------------------------------|-------------------------------------------------------------------|---------------------------------------------|
| 1997 | First use of Topmodel for continuous simulation flood frequency estimation                                     |                                                                   | Blazkova and Beven 1997 (Jizera catchments) |
| 1997 | Implementation of Topmodel in Matlab Simulink                                                                  | Romanowicz, 1997, (Severn, Plynlimon)                             |                                             |
| 1997 | Power law transmissivity functions and index                                                                   | Iorgulescu and Musy, 1997; Duan and Miller, 1997                  |                                             |
| 1997 | Generalised recession curve and index                                                                          | Lamb et al., 1997 (Saeterbekken)                                  |                                             |
| 1997 | Introduction of bedrock surface topographic index                                                              | Freer et al., 1997 (Maimai, Panola)                               |                                             |
| 1998 | Constraint of Topmodel uncertainty and back-calculation of local transmissivities from water table information | Lamb et al., 1998 (Saeterbekken); Blazkova et al. 2002 (Uhrlicka) |                                             |
| 1997 | Reducing dependence of predictions on grid resolution                                                          | Saulnier et al. 1997a,b                                           |                                             |
| 1997 | Including spatially variable soil depths in Topmodel                                                           | Saulnier et al. 1997c (Real Collobrier)                           |                                             |
| 1997 | Integration of TOPMODEL with a snowmelt model                                                                  | Holko and Lepisto 1997                                            |                                             |
| 1998 | Fuzzy estimates of saturated areas into the model evaluation process                                           | Franks et al. 1998 (Naizin)                                       |                                             |
| 1998 | Integration of TOPMODEL and GASFLUX vegetation-atmosphere exchange model                                       | Quinn et al. 1998                                                 |                                             |
| 1999 | First gridded subsurface kinematic wave model, DVSHM                                                           |                                                                   | Wigmosta et al., 1994                       |

|      |                                                                                      |                                      |                                                         |                                            |
|------|--------------------------------------------------------------------------------------|--------------------------------------|---------------------------------------------------------|--------------------------------------------|
| 1999 | Use of Topmodel for Flood frequency simulation under climate change with uncertainty |                                      | Cameron et al., 1999, 2000a,b; Blazkova and Beven, 2002 |                                            |
| 2000 | TOPURBAN: TOPMODEL modified for urban catchments                                     |                                      |                                                         | Valeo and Moin 2000                        |
| 2000 | Modified Topmodel for shallow subsurface flows                                       | Scanlon et al. 2000 (Brokenback Run) |                                                         |                                            |
| 2001 | First publication of Dynamic Topmodel                                                | Beven and Freer, 2001 (Slapton Wood) |                                                         |                                            |
| 2001 | Topmodel used in MeteoFrance land surface parameterisation                           |                                      |                                                         | Habets and Saulnier (2001) (ISBA-Topmodel) |
| 2002 | Conceptual changes to TOPMODEL for shallow subsurface flows                          | Walter et al. 2002                   |                                                         |                                            |
| 2003 | Topmodel used in UK MetOffice land surface parameterisation                          |                                      |                                                         | Essery et al. (2003) (MOSES)               |
| 2003 | Application of Dynamic TOPMODEL with different landscape structures                  | Peters et al. 2003 (Panola)          |                                                         |                                            |
| 2003 | Multiperiod conditioning of Topmodel parameters in GLUE                              | Freer et al. 2003 (Panola)           |                                                         |                                            |
| 2003 | Use of topographic index for disaggregation of passive satellite soil moisture data  | Pellenq et al. 2003 (Nerrigundah)    |                                                         |                                            |
| 2004 | Fuzzy estimates of water table depths in calibration of Dynamic Topmodel             | Freer et al. 2004 (Mamai)            |                                                         |                                            |
| 2004 | TOPNET: Networked version of Topmodel                                                | Bandargoda et al. 2004 (TOPSETUP)    |                                                         | Bandargoda et al. 2004                     |

|      |                                                                                                                       |                                   |                                     |                                        |
|------|-----------------------------------------------------------------------------------------------------------------------|-----------------------------------|-------------------------------------|----------------------------------------|
| 2006 | Fractal downscaling of topographic index                                                                              | Pradhan et al. 2006, 2008         |                                     |                                        |
| 2007 | Use of Dynamic Topmodel for water quality simulation                                                                  |                                   |                                     | Page et al. (2007) (Hafren, Plynlimon) |
| 2009 | Use of topographic index in SCIMAP                                                                                    |                                   |                                     | Lane et al. (2009)                     |
| 2009 | First application of Limits of Acceptability to condition Dynamic TOPMODEL                                            | Liu et al. 2009. (Attert)         |                                     |                                        |
| 2011 | Topmodel used in updated MetOffice land surface parameterisation                                                      |                                   | Best et al. (2011) (JULES)          |                                        |
| 2011 | Implementation of Topmodel in R                                                                                       | Buytaert, 2011, 2018              |                                     |                                        |
| 2015 | Version of Dynamic Topmodel in R                                                                                      | Metcalfe et al. (2015) (Brompton) |                                     |                                        |
| 2015 | Distributed Topmodel                                                                                                  |                                   |                                     | Gao et al. (2015)                      |
| 2016 | Dynamic Topmodel used in land surface parameterisation                                                                |                                   | Charney et al. (2016) (HydroBLOCKS) |                                        |
| 2019 | First application of DECIPHeR model with new subsurface formulation, large scale routing and different DTA approaches | Coxon et al. (2019) (Whole of GB) |                                     |                                        |

### Additional References to those in the paper

Bandaragoda, C., D. G. Tarboton, and R. Woods (2004), Application of TOPNET in the distributed model intercomparison project, *Journal of Hydrology*, 298(1-4), 178-201.

Beven, K. J., 1982, Introducing spatially variable conductivities into Topmodel, Unpublished Research Report, Department of Environmental Sciences, University of Virginia, Charlottesville, VA.

Bruneau, P., C. Gascuel-Oudou, P. Robin, Ph Merot and K.J. Beven (1995), Sensitivity to space and time resolution of a hydrological model using digital elevation data, *Hydrological Processes*, 9, 69-82.

Buytaert, W., 2011. topmodel: Implementation of the Hydrological Model TOPMODEL in R. *Global Change Biology*, pp.679-706 (also <https://CRAN.R-project.org/package=topmodel>)

Buytaert, W., 2018, Topmodel in R, available at <https://cran.r-project.org/web/packages/topmodel/topmodel.pdf> (last accessed 5.08.2020)

Holko, L. and Lepistö, A., 1997. Modelling the hydrological behaviour of a mountain catchment using TOPMODEL. *Journal of Hydrology*, 196(1-4), pp.361-377.

Pellenq, J., Kalma, J., Boulet, G., Saulnier, G. M., Wooldridge, S., Kerr, Y., and Chehbouni, A.: A disaggregation scheme for soil moisture based on topography and soil depth, *Journal of Hydrology*, 276, 112-127, doi: 10.1016/S0022-1694(03)00066-0, 2003

Quinn, P F, Ostendorf, B, Beven, K J and Tenhunen, J, 1998, Spatial and temporal predictions of soil moisture patterns and evaporative losses using TOPMODEL and the GAS-Flux model for an Alaskan catchment, *Hydrol. Earth System Sci.*, 2, 51-64.

Romanowicz, R., 1997, A MATLAB implementation of Topmodel, *Hydrological Processes*, 11(9): 1115-1130.

Valeo, C. and Moin, S.M.A., 2000. Variable source area modelling in urbanizing watersheds. *Journal of Hydrology*, 228(1-2), pp.68-81.

Wolock, D.M. and Price, C.V., 1994. Effects of digital elevation model map scale and data resolution on a topography-based watershed model. *Water Resources Research*, 30(11), pp.3041-3052.

Zhang, W. and Montgomery, D.R., 1994. Digital elevation model grid size, landscape representation, and hydrologic simulations. *Water Resources Research*, 30(4), pp.1019-1028.
